# Supplementary material for: Cell–Cell Contact Mediates Gene Expression and Fate Choice of Human Neural Stem/Progenitor Cells
Source: MDPI journal article supplement (doi:10.3390/cells11111741), 2022-05-25
Supplement: s1 [file s1]

**Supplementary Table S1.** Plating density alters gene expression in a pairwise manner. Samples X15L/H and X150L/H represent hiPSC-NPCs plated from different passages, whereas X16L/H represent a second hiPSC-NPC line curated from a different round of dual-SMAD inhibition. Fold change (LogFC) may not accurately represent proportional gene expression changes, as averages between all “L” and “H” samples were taken. As a result, false-discovery rate (FDR) and logFC are representative as groups and not intra-sample changes in gene expression. For example, X15L and X16H have similar values between high/low density groups, but their proportional change within identical samples plated at different densities (X16L & X16H) exhibit a more substantial change.

| Gene of Interest | X15L    | X150L  | X16L    | X15H    | X150H   | X16H    | LogFC | FDR    |
|------------------|---------|--------|---------|---------|---------|---------|-------|--------|
| <i>AQP4</i>      | 26      | 31     | 716     | 522     | 1430    | 12464   | 4.48  | .01    |
| <i>GFAP</i>      | 226,946 | 43,028 | 272,415 | 589,617 | 701,928 | 427,442 | 1.83  | .007   |
| <i>NOTCH1</i>    | 8787    | 5805   | 5570    | 11,468  | 11,640  | 9061    | 0.84  | .065   |
| <i>NEUROG1</i>   | 0       | 0      | 2       | 18      | 12      | 48      | 5.26  | <0.001 |
| <i>DLK1</i>      | 0       | 0      | 0       | 183     | 237     | 934     | 11.98 | <0.001 |
